# Supplementary material
Source: PubMed Central journal article supplement (PMC4473902)
Supplement: rcse9701-59-s1.pdf [file rcse9701-59-s1.pdf]

**Appendix 1** Relevant admission codes according to the International Statistical Classification of Diseases (ICD-10)

| Code  | Details                                                         |
|-------|-----------------------------------------------------------------|
| I74.0 | Embolism and thrombosis of abdominal aorta                      |
| I74.1 | Embolism and thrombosis of other and unspecified parts of aorta |
| I74.3 | Embolism and thrombosis of arteries of lower extremities        |
| I74.4 | Embolism and thrombosis of arteries of extremities, unspecified |
| I74.5 | Embolism and thrombosis of iliac artery                         |
| I74.8 | Embolism and thrombosis of other arteries                       |
| I74.9 | Embolism and thrombosis of unspecified artery                   |

**Appendix 2** Relevant procedure codes according to the Office of Population Censuses and Surveys Classification of Interventions and Procedures (OPCS-4)

| Code  | Details                                                                                                      |
|-------|--------------------------------------------------------------------------------------------------------------|
| L16.1 | Emergency bypass of aorta by anastomosis of axillary artery to femoral artery                                |
| L20.6 | Emergency bypass of bifurcation of aorta by anastomosis of aorta to iliac artery NEC                         |
| L25.3 | Open embolectomy of bifurcation of aorta                                                                     |
| L26.3 | Percutaneous transluminal embolectomy of bifurcation of aorta                                                |
| L50.1 | Emergency bypass of common iliac artery by anastomosis of aorta to common iliac artery NEC                   |
| L50.2 | Emergency bypass of iliac artery by anastomosis of aorta to external iliac artery NEC                        |
| L50.3 | Emergency bypass of artery of leg by anastomosis of aorta to common femoral artery NEC                       |
| L50.4 | Emergency bypass of artery of leg by anastomosis of aorta to deep femoral artery NEC                         |
| L50.5 | Emergency bypass of iliac artery by anastomosis of iliac artery to iliac artery NEC                          |
| L50.6 | Emergency bypass of artery of leg by anastomosis of iliac artery to femoral artery NEC                       |
| L50.8 | Other specified other emergency bypass of iliac artery                                                       |
| L50.9 | Unspecified other emergency bypass of iliac artery                                                           |
| L53.2 | Open embolectomy of iliac artery                                                                             |
| L54.2 | Percutaneous transluminal embolectomy of iliac artery                                                        |
| L58.1 | Emergency bypass of femoral artery by anastomosis of femoral artery to femoral artery NEC                    |
| L58.2 | Emergency bypass of femoral artery by anastomosis of femoral artery to popliteal artery using prosthesis NEC |
| L58.3 | Emergency bypass of femoral artery by anastomosis of femoral artery to popliteal artery using vein graft NEC |
| L58.4 | Emergency bypass of femoral artery by anastomosis of femoral artery to tibial artery using prosthesis NEC    |
| L58.5 | Emergency bypass of femoral artery by anastomosis of femoral artery to tibial artery using vein graft NEC    |
| L58.6 | Emergency bypass of femoral artery by anastomosis of femoral artery to peroneal artery using prosthesis NEC  |
| L58.7 | Emergency bypass of femoral artery by anastomosis of femoral artery to peroneal artery using vein graft NEC  |
| L58.8 | Other specified other emergency bypass of femoral artery                                                     |
| L58.9 | Unspecified other emergency bypass of femoral artery                                                         |
| L62.2 | Open embolectomy of femoral artery                                                                           |
| L63.2 | Percutaneous transluminal embolectomy of femoral artery                                                      |
| L66.1 | Percutaneous transluminal arterial thrombolysis and reconstruction                                           |

NEC = not elsewhere classified
